# Supplementary material
Source: PubMed Central journal article supplement (PMC6738911)
Supplement: kccy-18-19-1651587-s004.pdf [file kccy-18-19-1651587-s004.pdf]

**Table S1**

| Gene   | Gene Ref.      | Forward                     | Reverse                     |
|--------|----------------|-----------------------------|-----------------------------|
| CD31   | NM_000442.5    | F - GAGGGCAAACCCTTCTATCAA   | R - CTGTCTCTGTGTCCTTCTTTCC  |
| CD144  | NM_001795.5    | F - CAACTCCATACTCCACTCCAAG  | R - CCACATCTTGGGTTCTCTAAA   |
| KDR    | NM_002253.3    | F - GGACTTCCAGGGAGGAAATAAA  | R - TCTTGAGCAAGGCAGACATAG   |
| Tie2   | NM_000459.4    | F - GACTGTGGACAAGGGAGATAAC  | R - CTCACACGTCCTTCCCATAAA   |
| NOS3   | NM_000603.5    | F - ACAGTTACCAGCTAGCCAAAG   | R - CACCACGTCATACTCATCCATAC |
| VWF    | NM_000552.4    | F - AAGCAGACATACCAGGAGAAAAG | R - CAGGAGCAGGTGTCGTAAAT    |
| BMP4   | NM_001202.6    | F - CGGGCCAGGAAGAAGAATAAG   | R - CGTGTGTGTGTGGTGTATGT    |
| T      | NM_080646.1    | F - ACGACAACGGCCACATTAT     | R - CACTTCTCTCTCTGGTGTGTTCC |
| Cxcr4  | NM_001008540.2 | F - GAGAAGCATGACGGACAAGTA   | R - TGACAATACCAGGCAGGATAAG  |
| GATA4  | NM_001308093.1 | F - GGAAGCCCAAGAACCTGAATA   | R - CAGGAATTTGAGGAGGGGAAGAG |
| Pax6   | NM_000280.4    | F - CATTGCTCCGGCATGAAATATAC | R - CCAGCGAGAAGGAAGAAGTAAG  |
| Nestin | NM_006617.2    | F - GGACAAGAGAACCTGGAAACA   | R - GCTCTGCCTCATCCTCATT     |
| CD11b  | NM_001145808.2 | F - CTTACGGCCTCAGAGAATAC    | R - CACGATCAGGAGGTGGTTATG   |
| CD45   | NM_002838.5    | F - TCCAGGAGAGCCTCAGATTAT   | R - CACATTGCAGCACTTCCATTAC  |
| CD235a | NM_002099.8    | F - CAGAAGAGGAAACCGGAGAAAAG | R - GAGTGTCCAGTCCACATGTTAAT |
| CD90   | NM_006288.4    | F - GGGTTGGAGAAGGAGGTAAAG   | R - CACAGTCACAGAACAGGAAGA   |
| CD105  | NM_001114753.2 | F - AATGAGGCGGTGGTCAATATC   | R - TGGGTATGGGTACTGTGTAGAA  |
| CD34   | NM_001025109.2 | F - CTGGTTTCCACCCTCAAGATTA  | R - GCTGGACTTCCCTACTGATTAC  |
| C-Myb  | NM_001130173.2 | F - CTCCAAGAACTCCTACACCATTC | R - GTCATCTGCTCCTCCATCTTTC  |
